# Supplementary material for: Low renal replacement therapy incidence among slowly progressing elderly chronic kidney disease patients referred to nephrology care: an observational study
Source: Springer Nature journal article supplement (doi:10.1186/s12882-017-0473-1), 2017-02-10
Supplement: MOESM2 [file 12058828]

**Figure S1.** Description of study design.

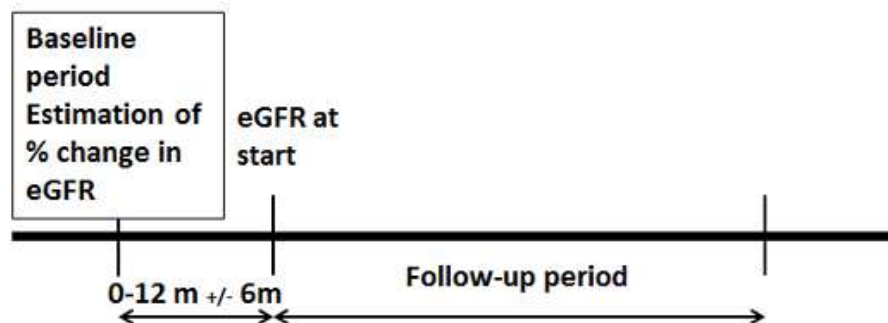

**Figure S2.** Five-year cause-specific probabilities of renal replacement therapy and death before renal replacement therapy for diabetic patients with a fast and slow progression rate stratified by age and chronic kidney disease stage

| Cause-specific probability of RRT |           | Non - progressors |       |      | Progressors |       |      |
|-----------------------------------|-----------|-------------------|-------|------|-------------|-------|------|
|                                   |           | Age               |       |      | Age         |       |      |
|                                   | CKD stage | <65               | 65-75 | >75  | <65         | 65-75 | >75  |
|                                   | IIIb      | 15.9              | 10.5  | 7.5  | 32.2        | 22.0  | 16.0 |
| IV                                | 29.8      | 20.3              | 14.7  | 54.7 | 39.8        | 30.0  |      |
| V                                 | 50.4      | 36.2              | 27.0  | 79.2 | 63.4        | 50.6  |      |

| <b>Cause-specific<br/>probability of death<br/>before RRT</b> |                  | <b>Non - progressors</b> |              |               | <b>Progressors</b> |              |               |
|---------------------------------------------------------------|------------------|--------------------------|--------------|---------------|--------------------|--------------|---------------|
|                                                               |                  | <b>Age</b>               |              |               | <b>Age</b>         |              |               |
|                                                               | <b>CKD stage</b> | <b>&lt;65</b>            | <b>65-75</b> | <b>&gt;75</b> | <b>&lt;65</b>      | <b>65-75</b> | <b>&gt;75</b> |
|                                                               | <b>IIIb</b>      | 15.0                     | 33.1         | 58.8          | 18.7               | 40.1         | 67.7          |
| <b>IV</b>                                                     | 14.1             | 31.3                     | 56.4         | 17.5          | 38.0               | 65.2         |               |
| <b>V</b>                                                      | 14.2             | 31.5                     | 56.6         | 17.7          | 38.3               | 65.5         |               |
